# Supplementary material for: Ascorbate sensitizes human osteosarcoma cells to the cytostatic effects of cisplatin
Source: PubMed Central journal article supplement (PMC7387887; doi:10.1002/prp2.632), 2020-07-29
Supplement: PRP2-8-e00632-s001.pdf [file PRP2-8-e00632-s001.pdf]

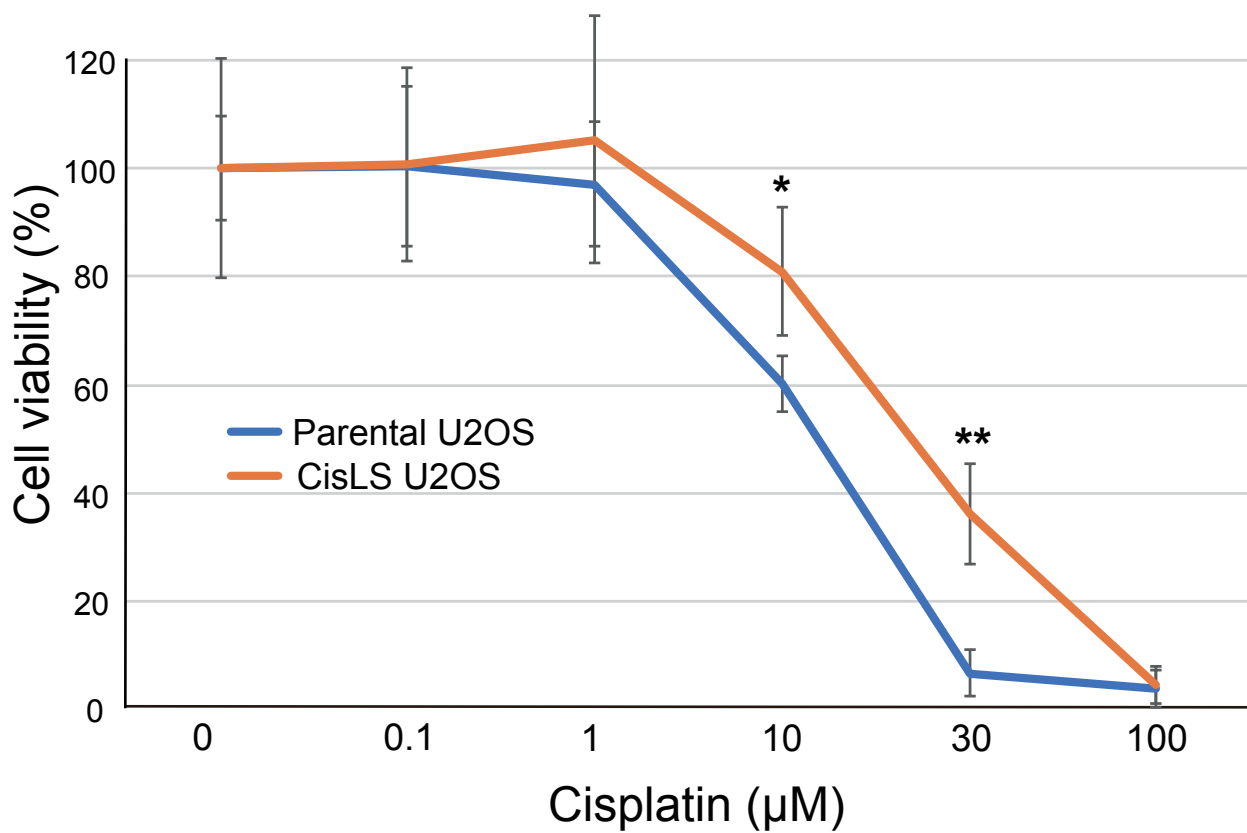

**Fig. S1. Dose response curves for parental and cisplatin-resistant U2OS cells.**

The cell viability assay was performed. The IC<sub>50</sub> value for cisplatin was calculated from the curves constructed by plotting cellular viability versus drug concentration. Data are presented as the mean  $\pm$  SD (n=6) from three independent experiments. \* $p < 0.05$ ; \*\* $p < 0.01$ .
